# Supplementary material for: Polyoxygenated Klysimplexane- and Eunicellin-Based Diterpenoids from the Gorgonian Briareum violaceum
Source: Molecules. 2021 May 28;26(11):3276. doi: 10.3390/molecules26113276 (PMC8198191; doi:10.3390/molecules26113276)
Supplement: Supplementary file 1 [file molecules-26-03276-s001.zip › molecules-1164366-supplementary.pdf]

Supplementary Materials

# Polyoxygenated Klysimplexane- and Eunicellin-Based Diterpenoids from the Gorgonian *Briareum violaceum*

Atallah F. Ahmed <sup>1,2,†</sup>, Yang Cheng <sup>3,†</sup>, Chang-Feng Dai <sup>4</sup> and Jyh-Horng Sheu <sup>3,5,6,7,\*</sup>

<sup>1</sup> Department of Pharmacognosy, College of Pharmacy, King Saud University, Riyadh 11451, Saudi Arabia; afahmed@ksu.edu.sa

<sup>2</sup> Department of Pharmacognosy, Faculty of Pharmacy, Mansoura University, Mansoura 35516, Egypt; afahmed@ksu.edu.sa

<sup>3</sup> Department of Marine Biotechnology and Resources, National Sun Yat-sen University, Kaohsiung 804, Taiwan; jack1991106@yahoo.com.tw (Y.C.); sheu@mail.nsysu.edu.tw (J.-H. S.)

<sup>4</sup> Institute of Oceanography, National Taiwan University, Taipei 112, Taiwan; corallab@ntu.edu.tw

<sup>5</sup> Graduate Institute of Natural Products, Kaohsiung Medical University, Kaohsiung 807, Taiwan; sheu@mail.nsysu.edu.tw

<sup>6</sup> Frontier Center for Ocean Science and Technology, National Sun Yat-sen University, Kaohsiung 804, Taiwan; sheu@mail.nsysu.edu.tw

<sup>7</sup> Department of Medical Research, China Medical University Hospital, China Medical University, Taichung 404, Taiwan; sheu@mail.nsysu.edu.tw

\* Correspondence: Correspondence: sheu@mail.nsysu.edu.tw; Tel.: +886-7-525-2000 (ext. 5030); Fax: +886-7-525-5020

† These authors contributed equally to this work.

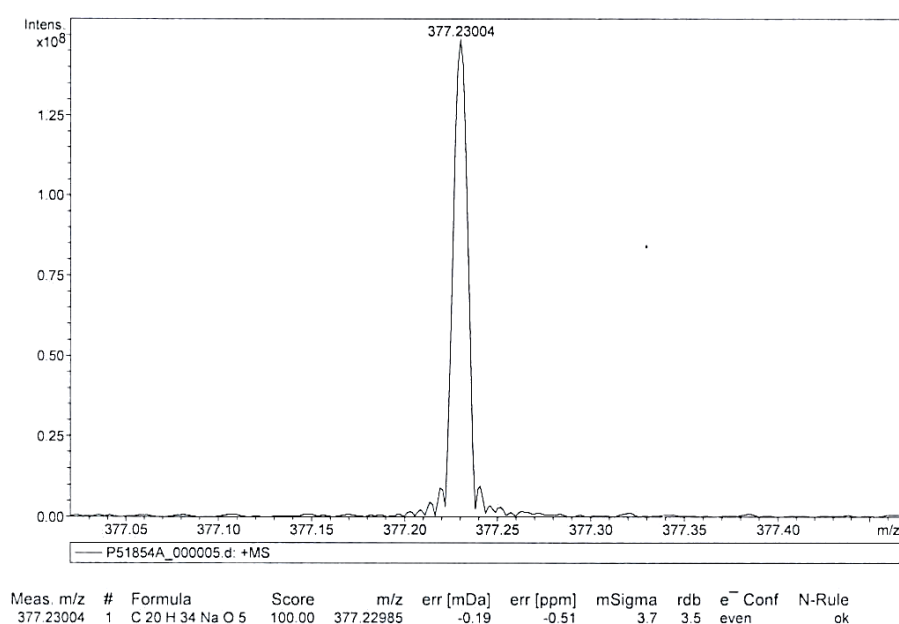

Figure S1. HRESIMS spectrum of **1**.

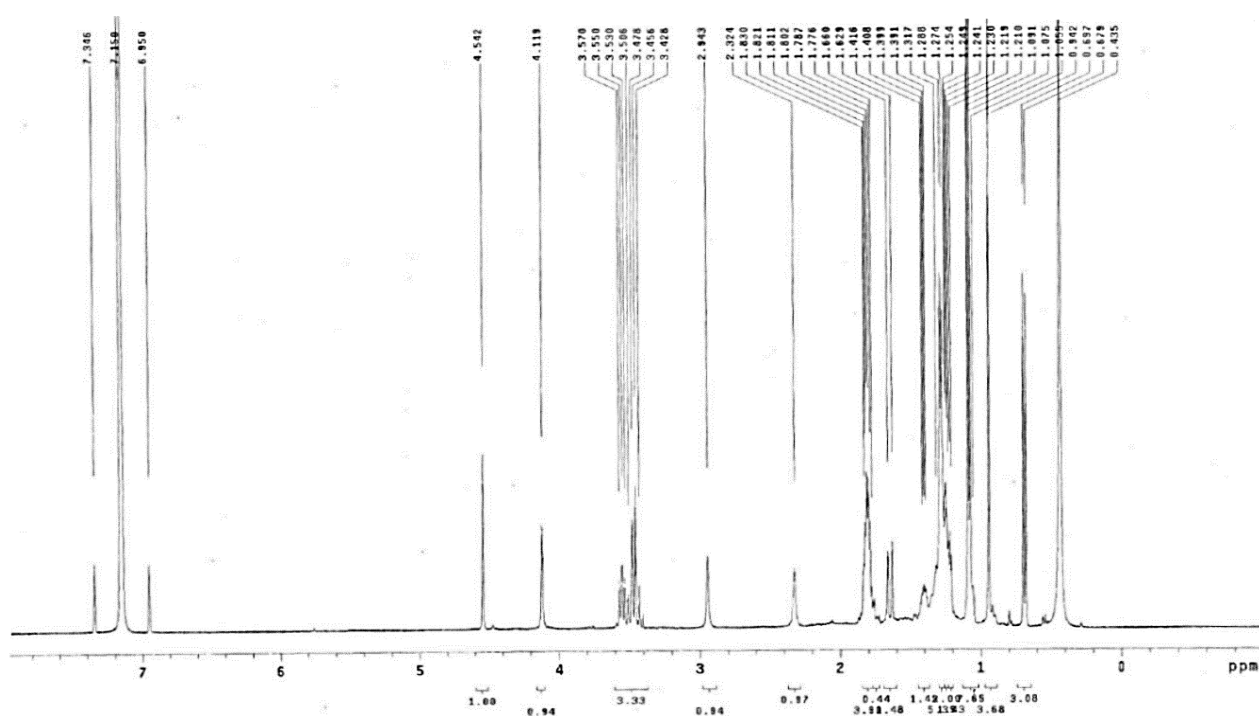Figure S2. <sup>1</sup>H NMR spectrum of 1 in C<sub>6</sub>D<sub>6</sub> at 400 MHz.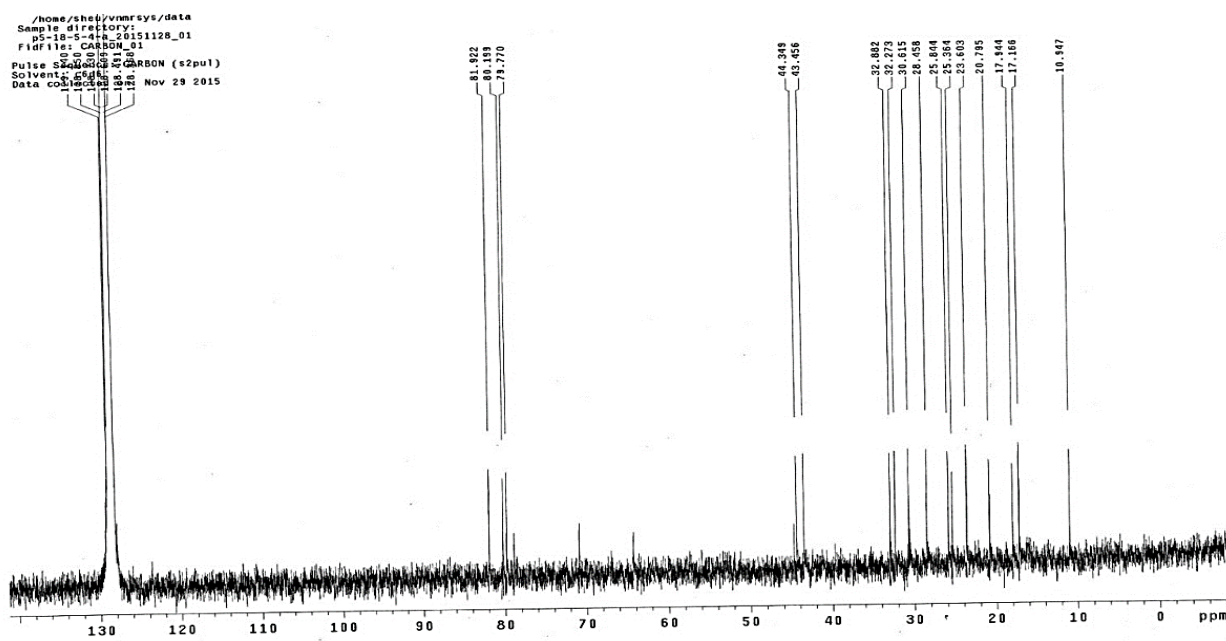Figure S3. <sup>13</sup>C NMR spectrum of 1 in C<sub>6</sub>D<sub>6</sub> at 100 MHz.

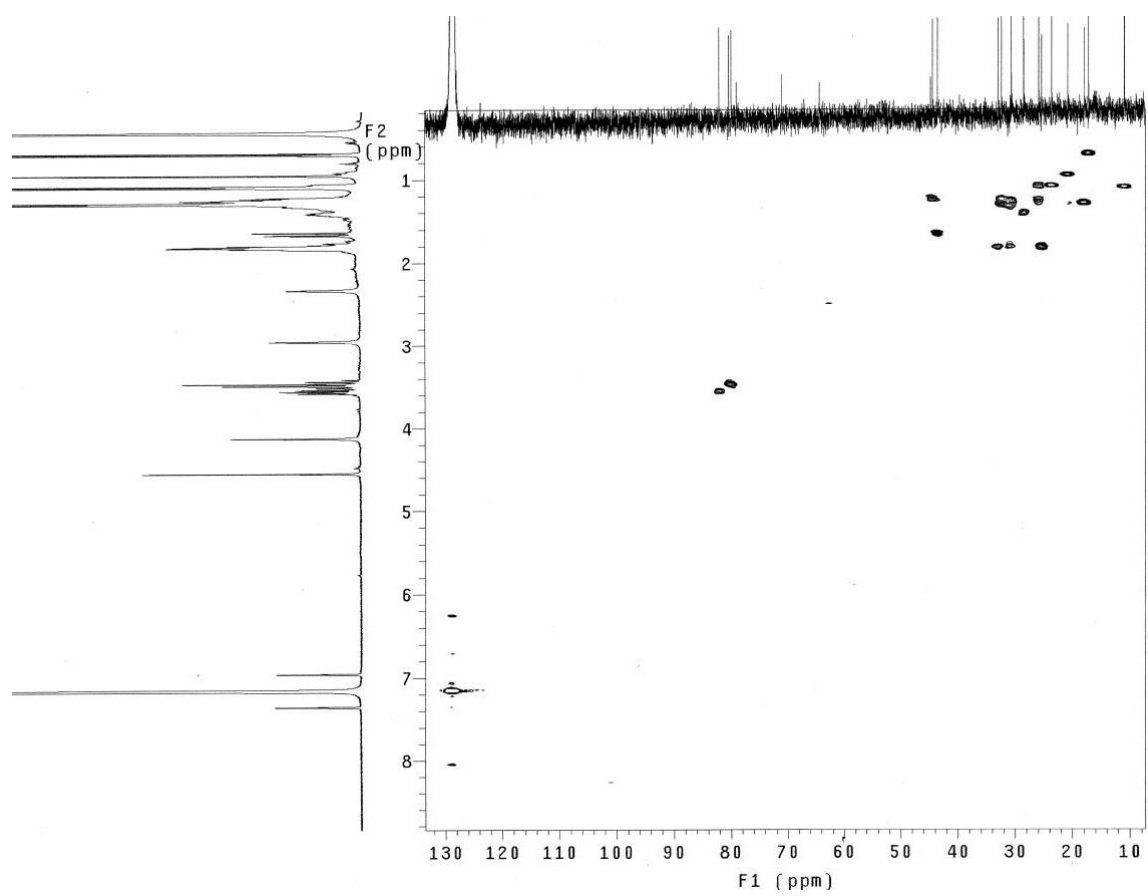

Figure S4. HMQC spectrum of **1** in C<sub>6</sub>D<sub>6</sub>.

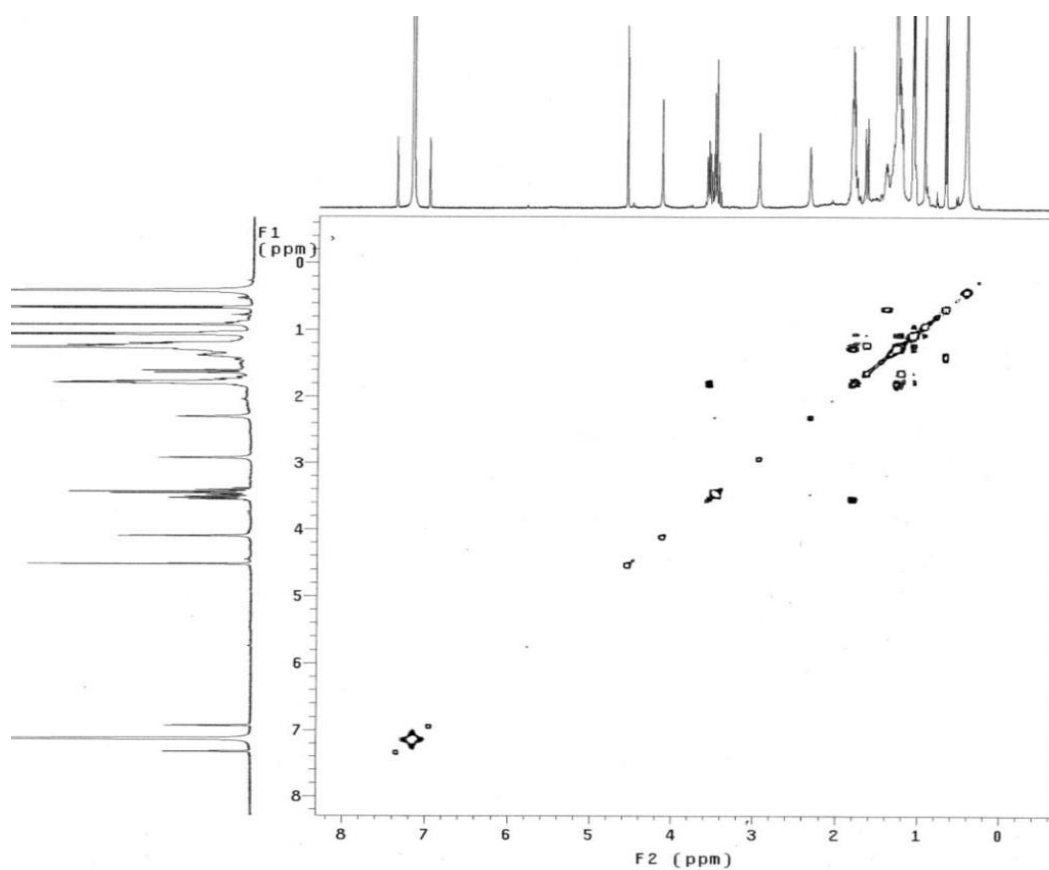

Figure S5. COSY spectrum of **1** in C<sub>6</sub>D<sub>6</sub>.

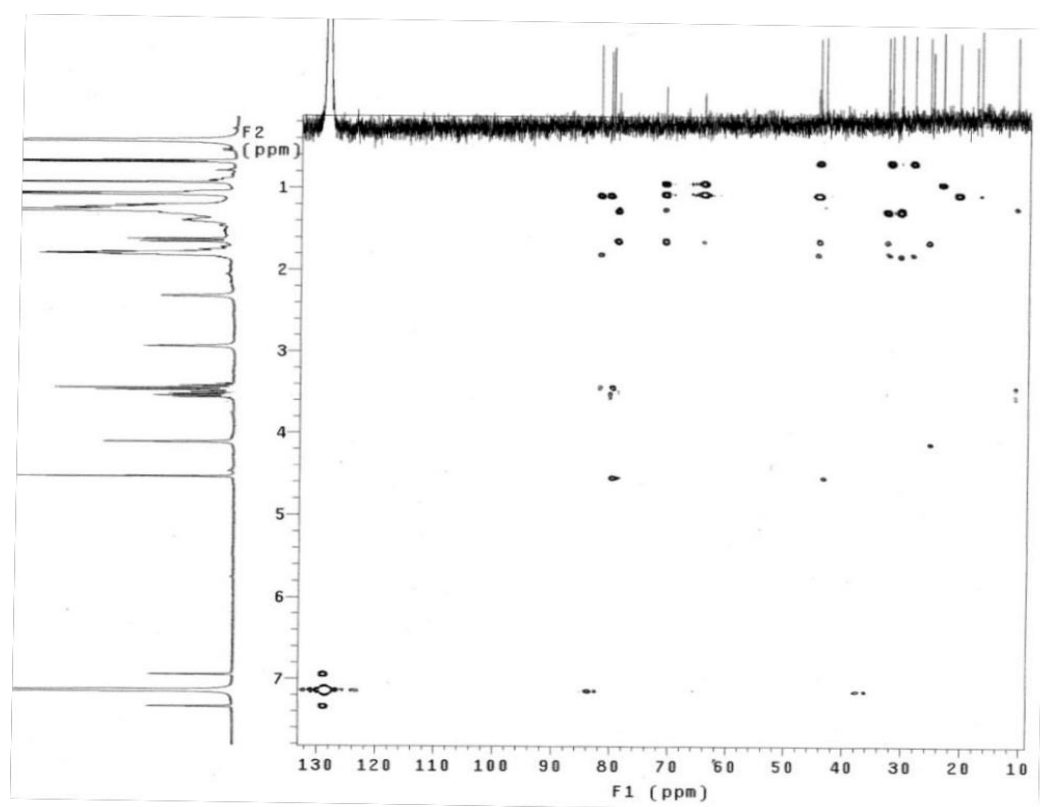

Figure S6. HMBC spectrum of **1** in C<sub>6</sub>D<sub>6</sub>.

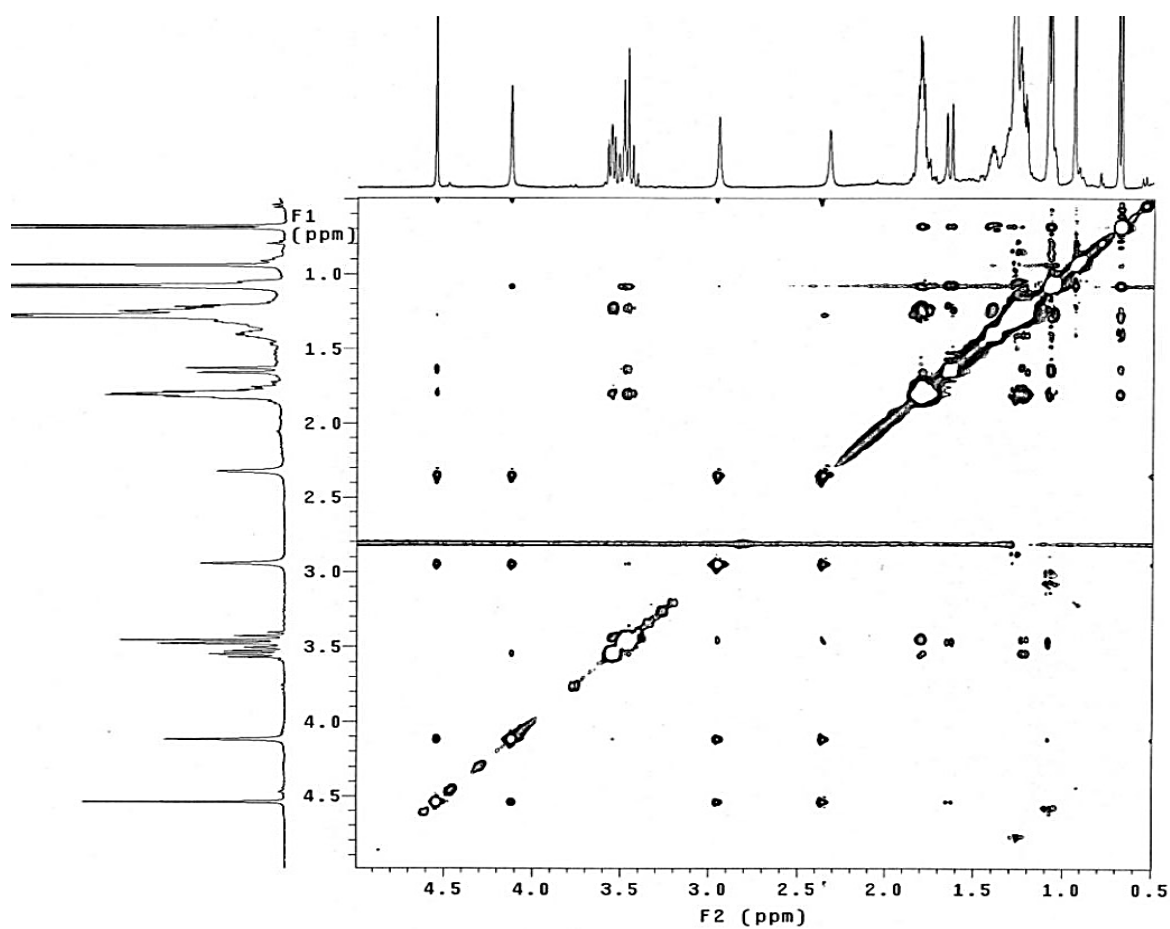Figure S7. NOESY spectrum of 1 in C<sub>6</sub>D<sub>6</sub>.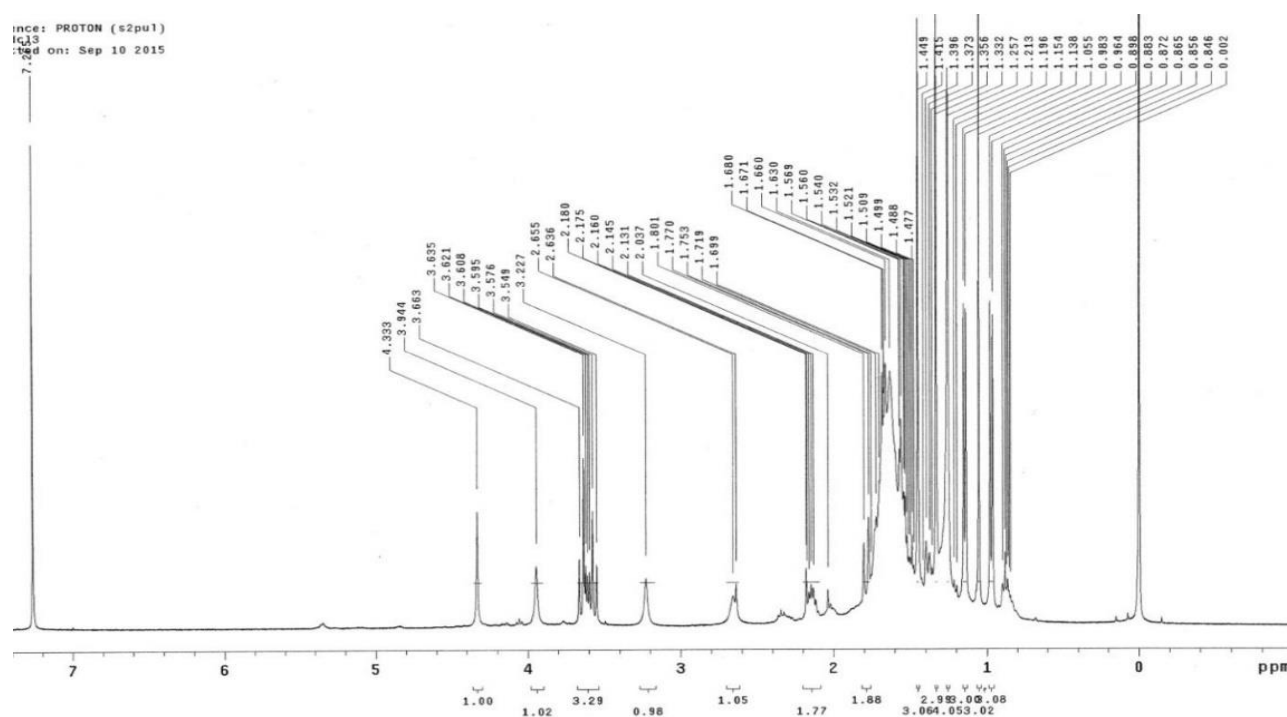Figure S8. <sup>1</sup>H NMR spectrum of 1 in CDCl<sub>3</sub> at 400 MHz.

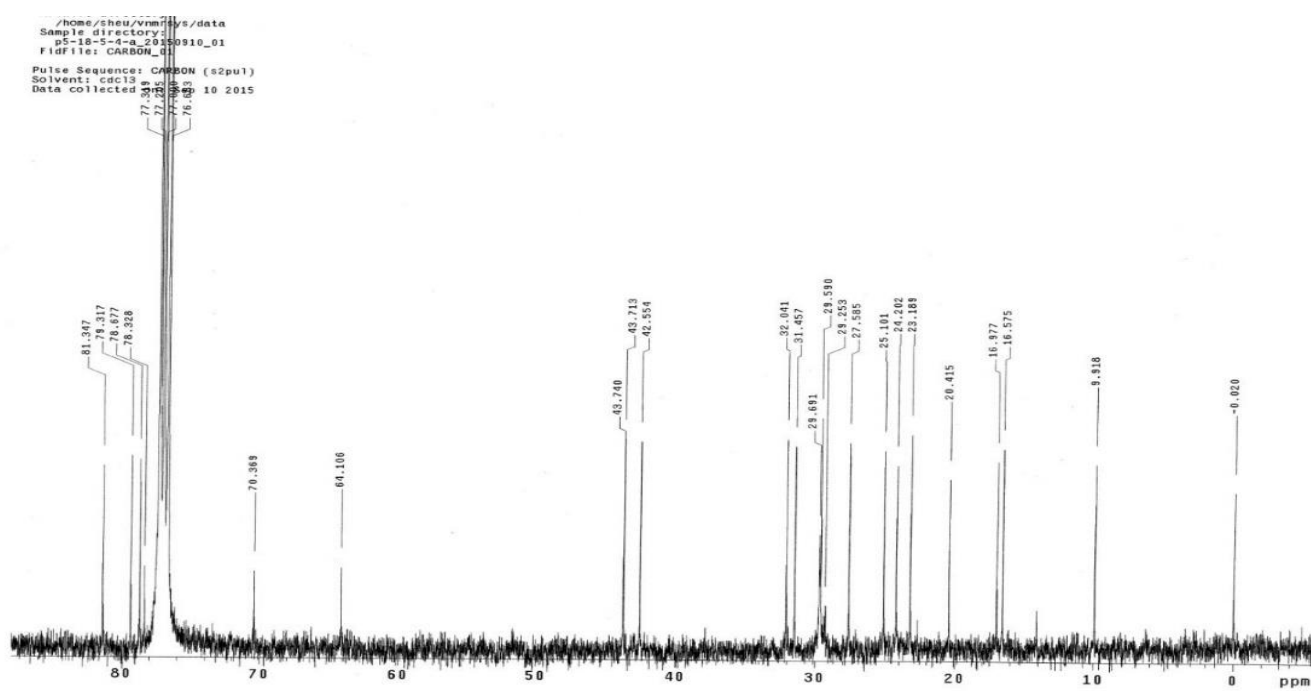

Figure S9.  $^{13}\text{C}$  NMR spectrum of 1 in  $\text{CDCl}_3$  at 100 MHz.

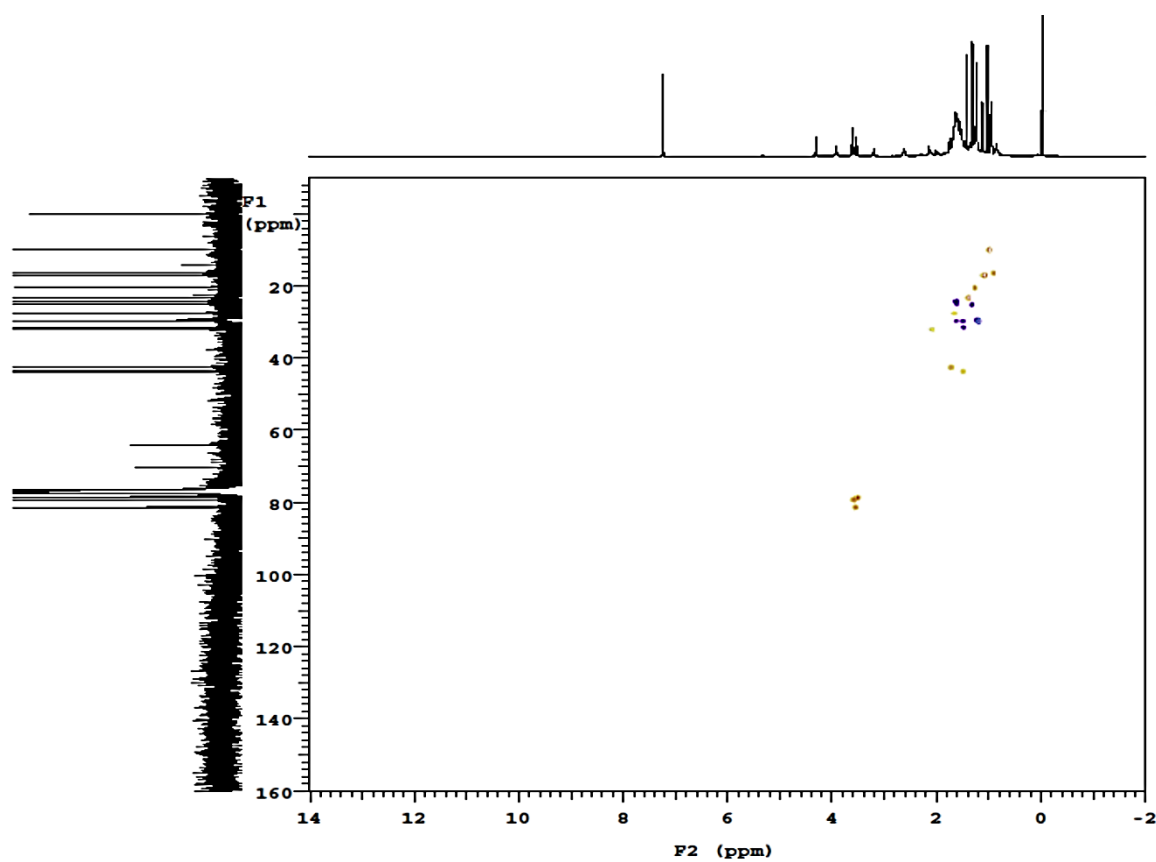

Figure S10. HMQC spectrum of 1 in  $\text{CDCl}_3$ .

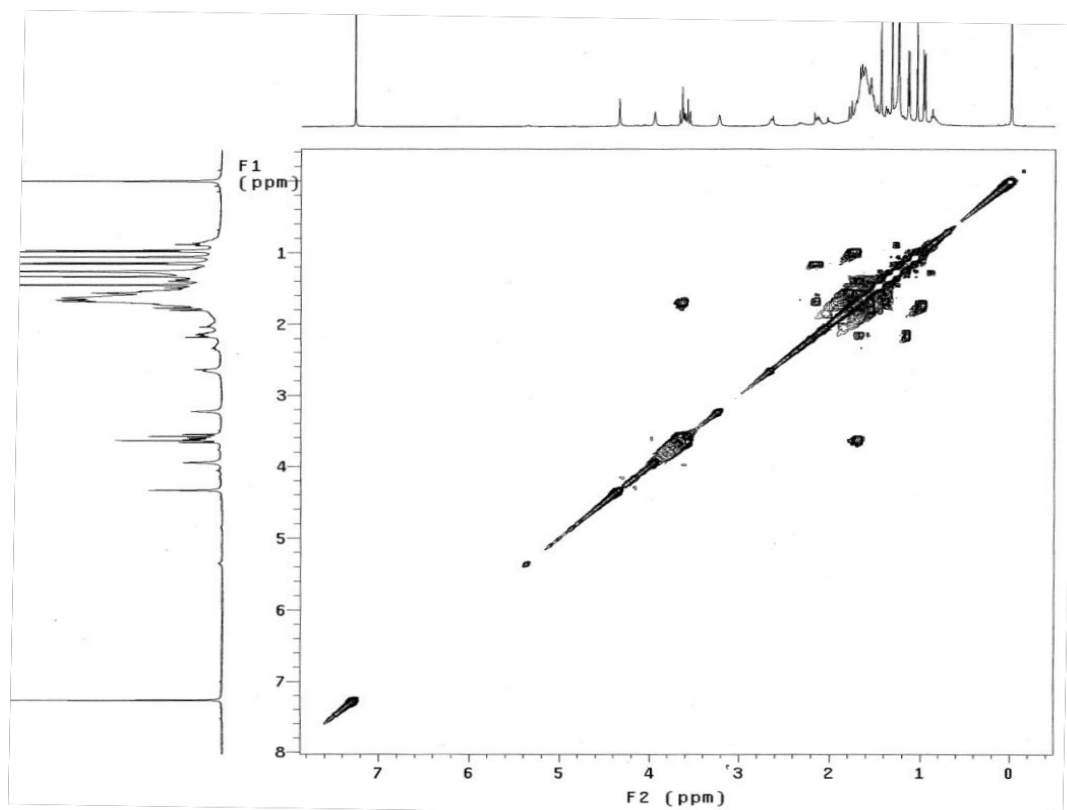

Figure S11. COSY spectrum of 1 in CDCl<sub>3</sub>.

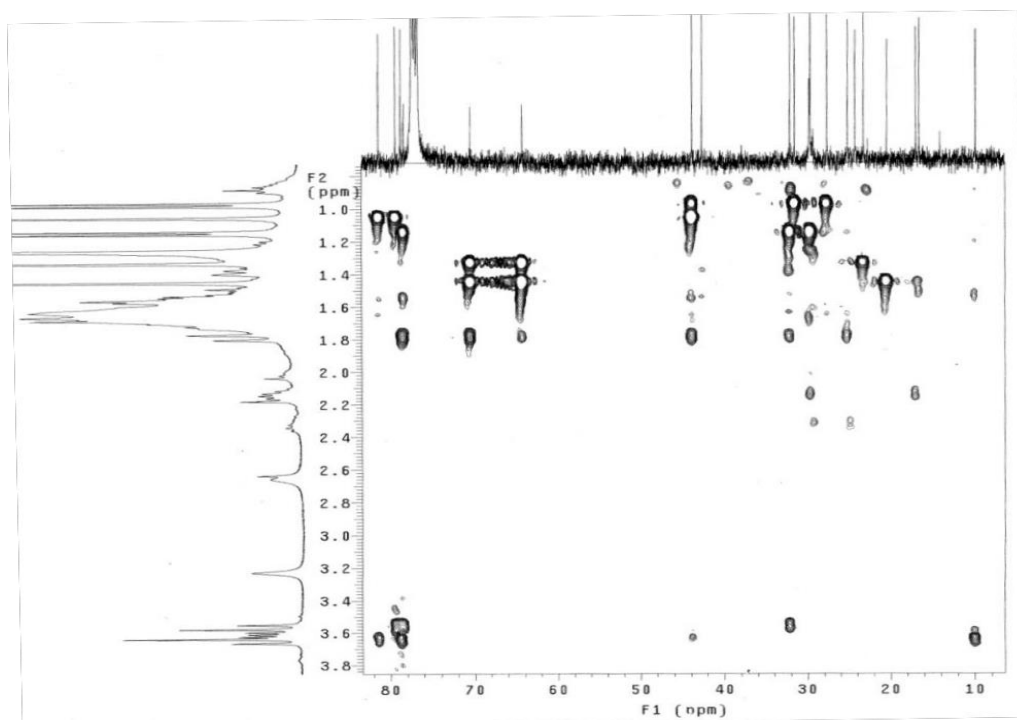

Figure S12. HMBC spectrum of 1 in CDCl<sub>3</sub>.

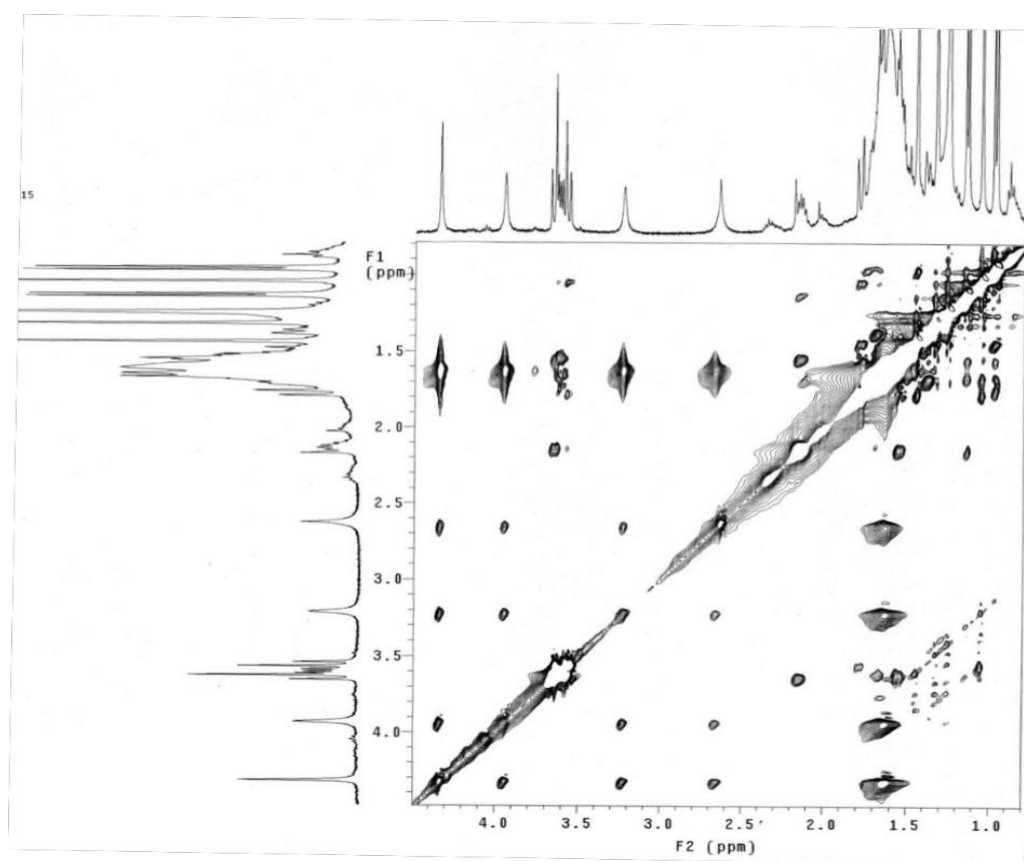

Figure S13. NOESY spectrum of **1** in  $\text{CDCl}_3$ .

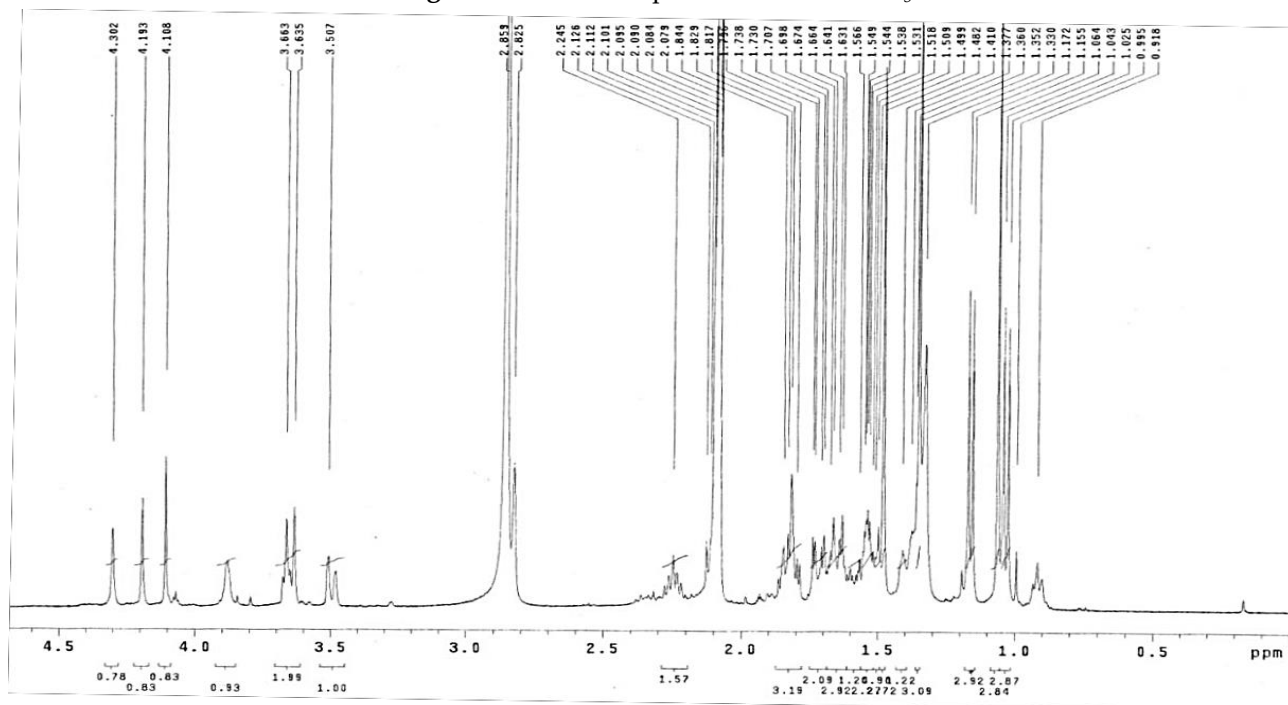

Figure S14.  $^1\text{H}$  NMR spectrum of **1** in acetone- $d_6$  at 400 MHz.

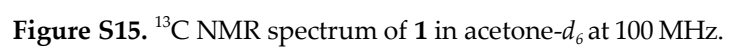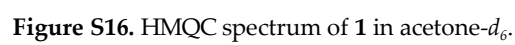

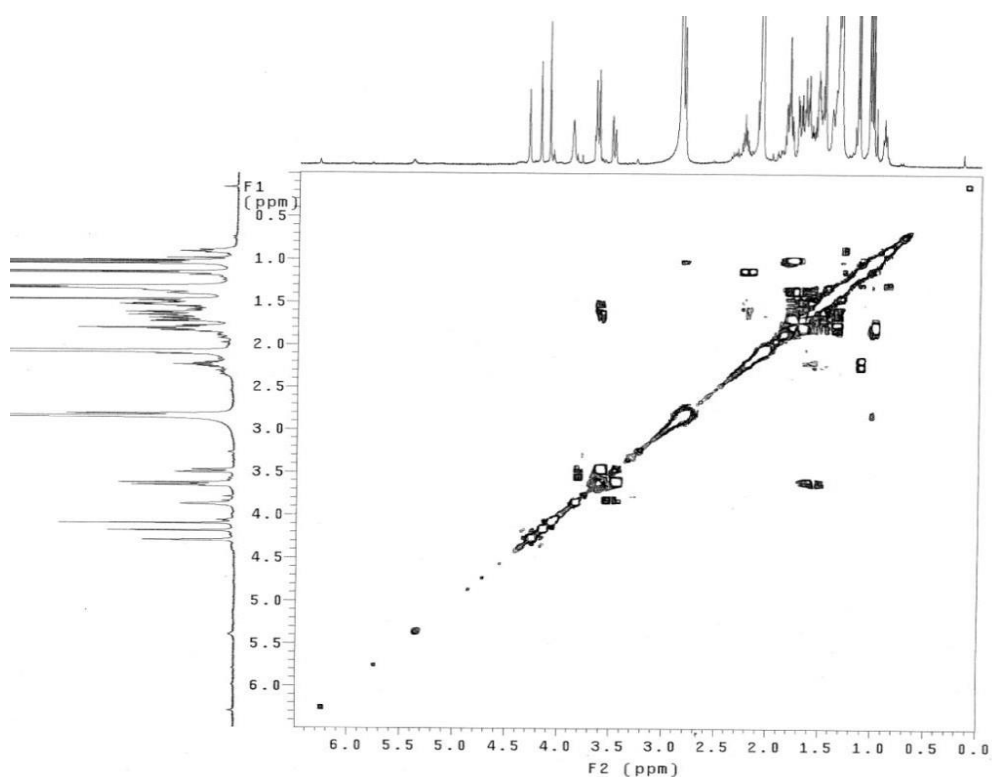

Figure S17. COSY spectrum of **1** in acetone-*d*<sub>6</sub>.

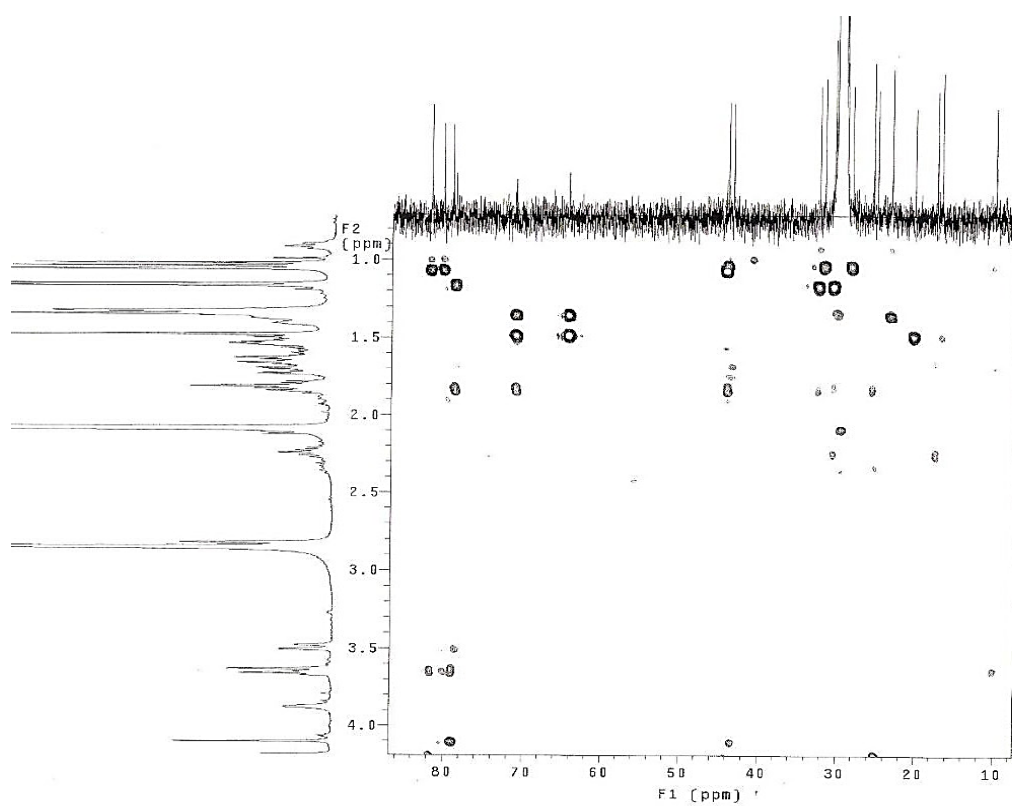

Figure S18. HMBC spectrum of **1** in acetone-*d*<sub>6</sub>.

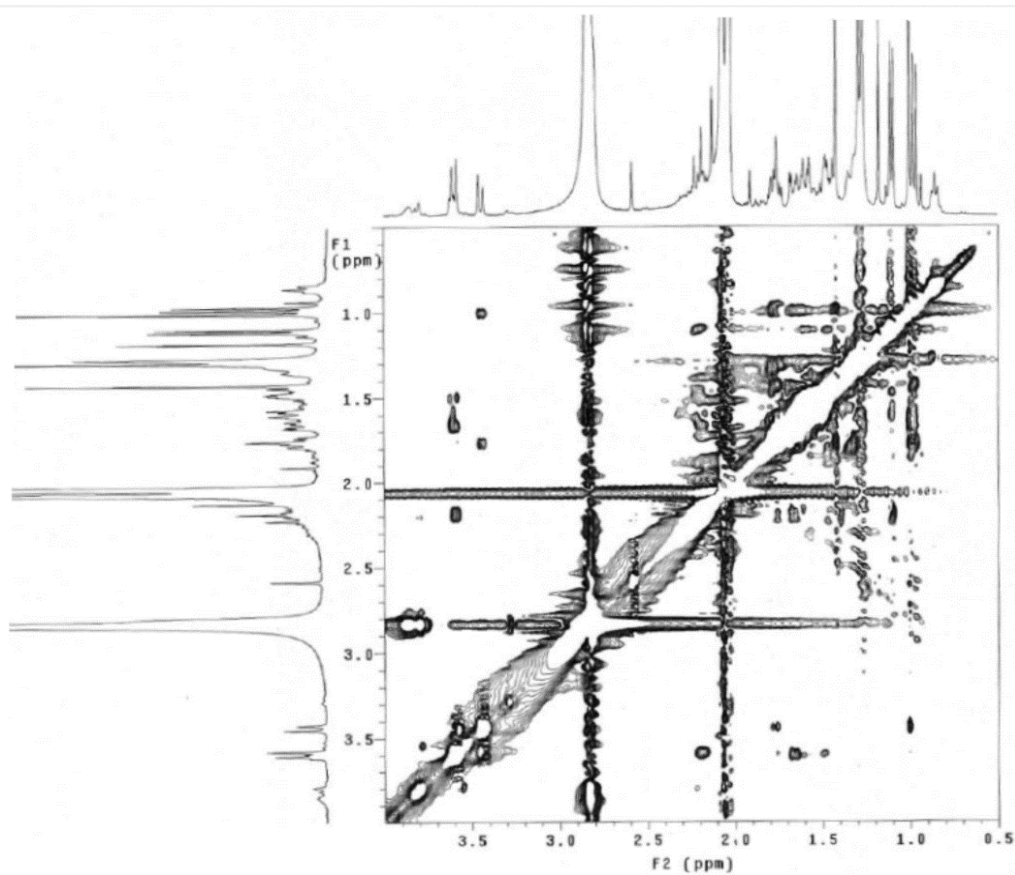Figure S19. NOESY spectrum of 1 in acetone- $d_6$ .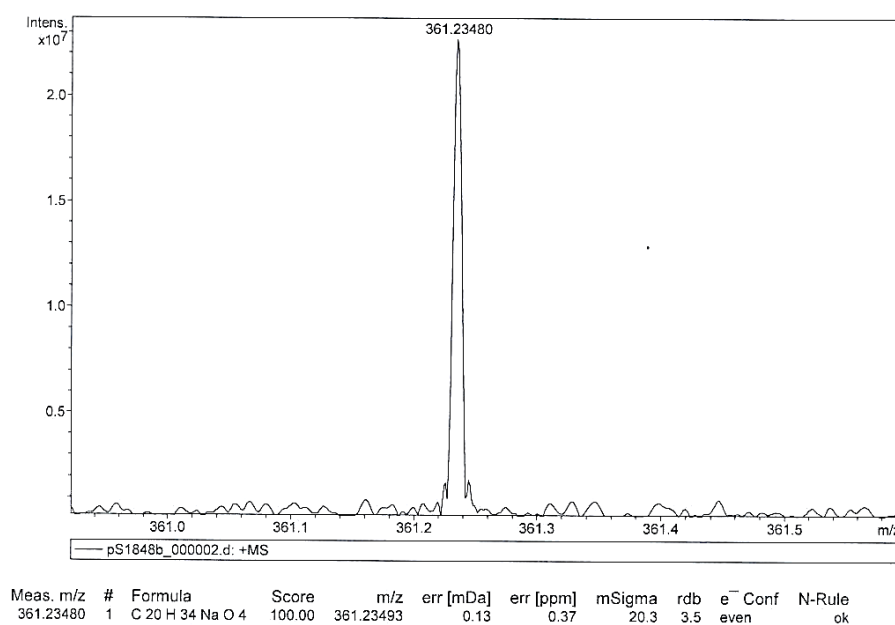

Figure S20. HRESIMS spectrum of 2.

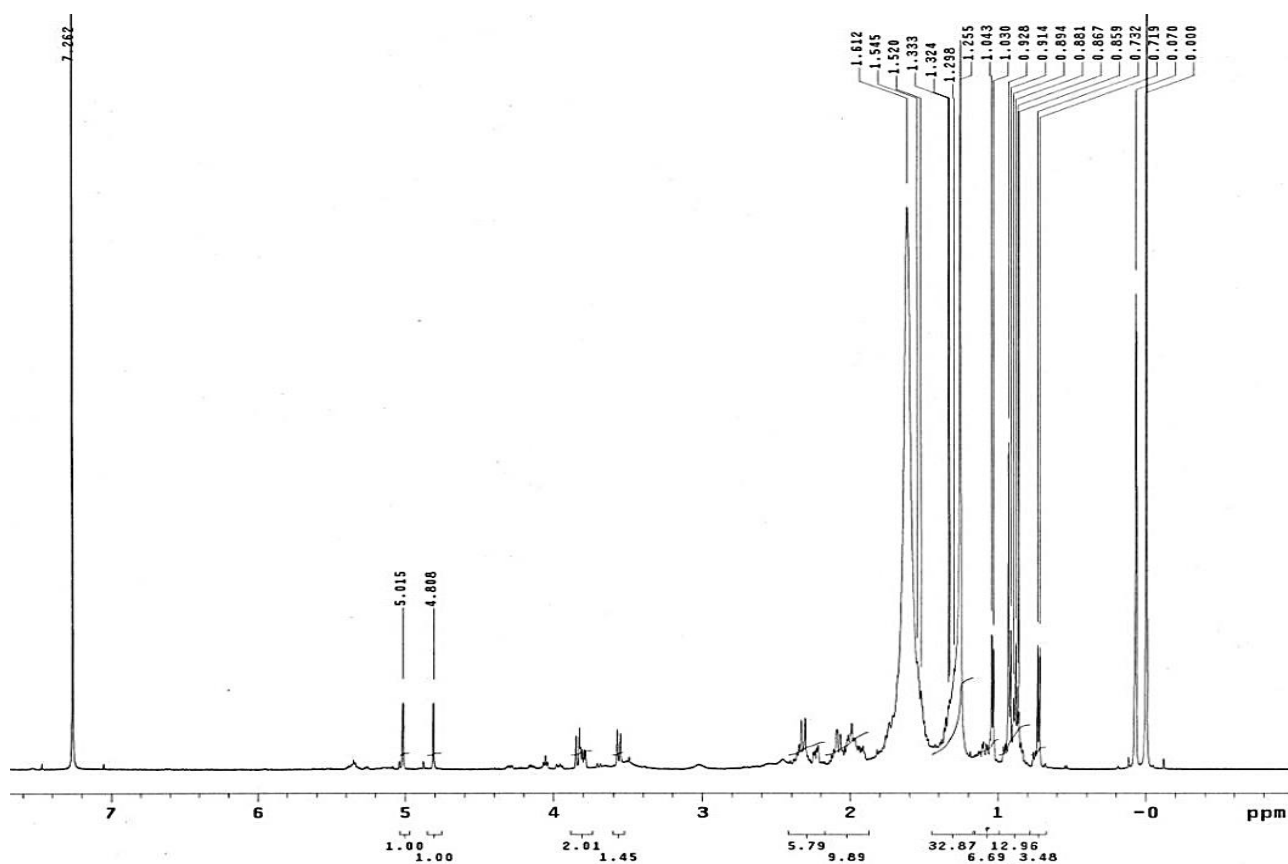

Figure S21. <sup>1</sup>H NMR spectrum of 2 in CDCl<sub>3</sub> at 500 MHz.

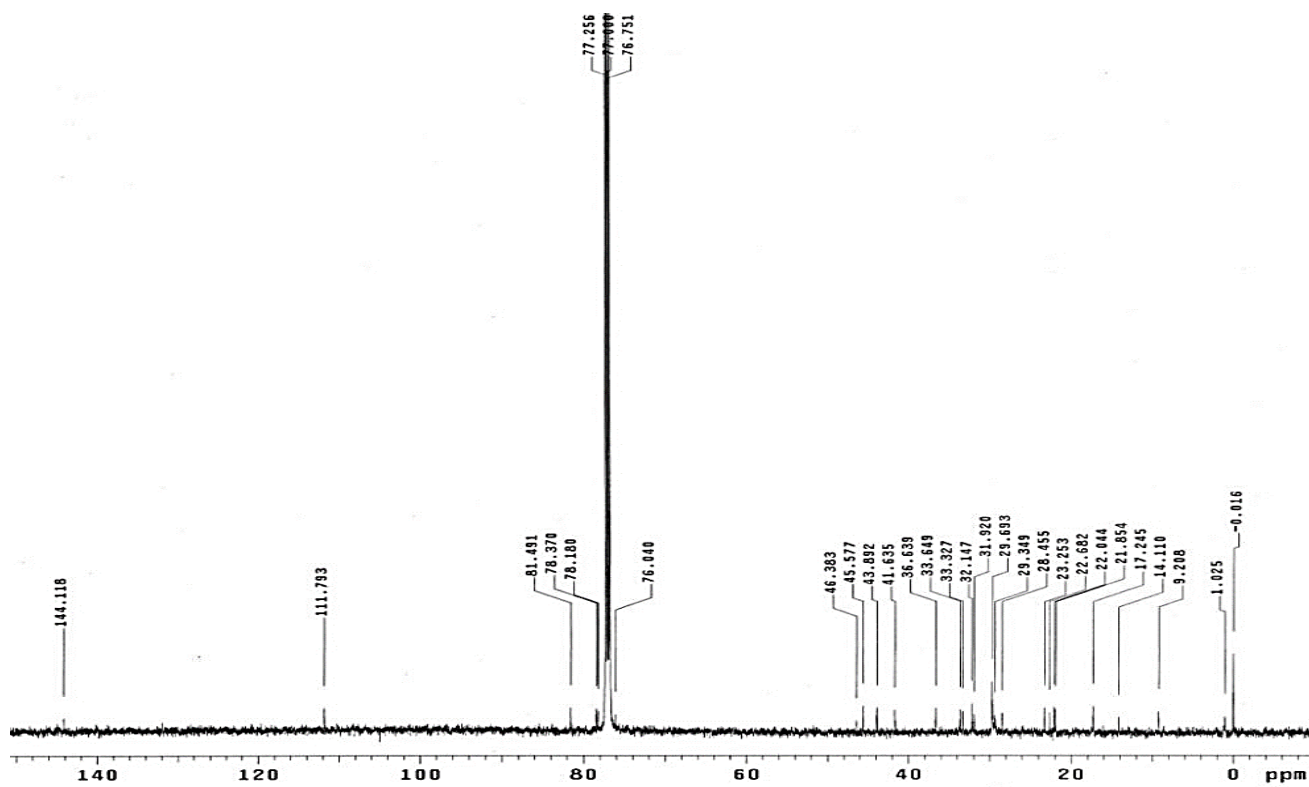

Figure S22. <sup>13</sup>C NMR spectrum of 2 in CDCl<sub>3</sub> at 125 MHz.

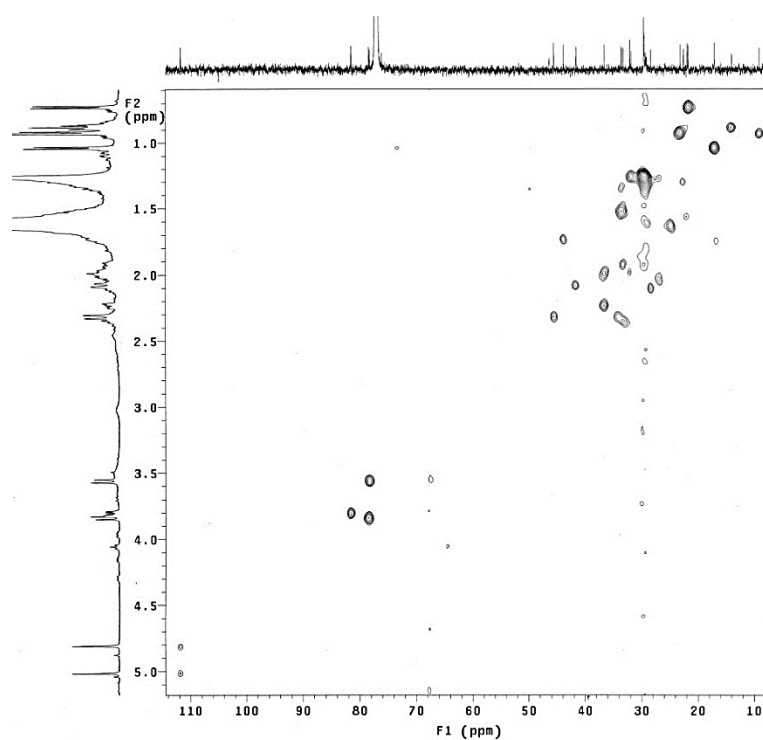

Figure S23. HSQC spectrum of **2** in  $\text{CDCl}_3$ .

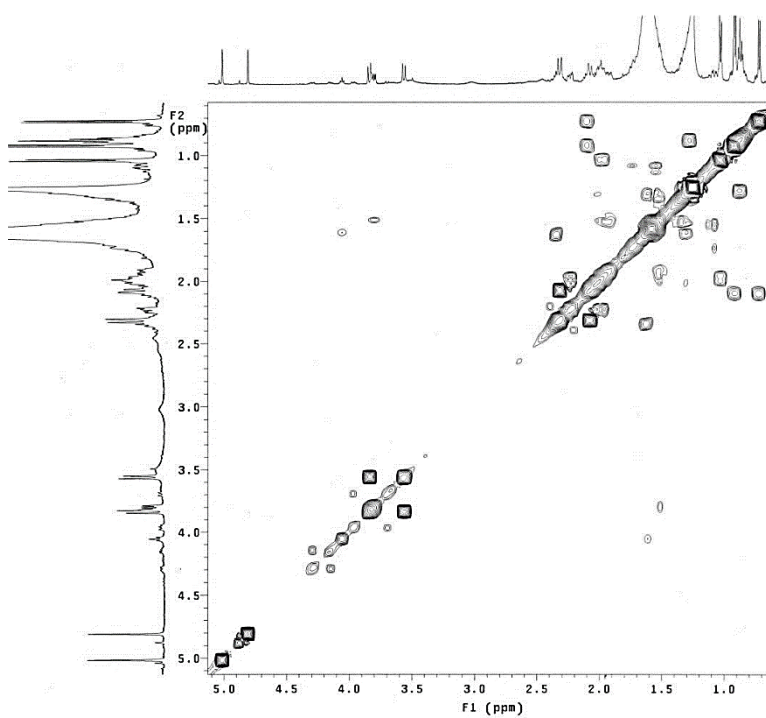

Figure S24. COSY spectrum of **2** in  $\text{CDCl}_3$ .

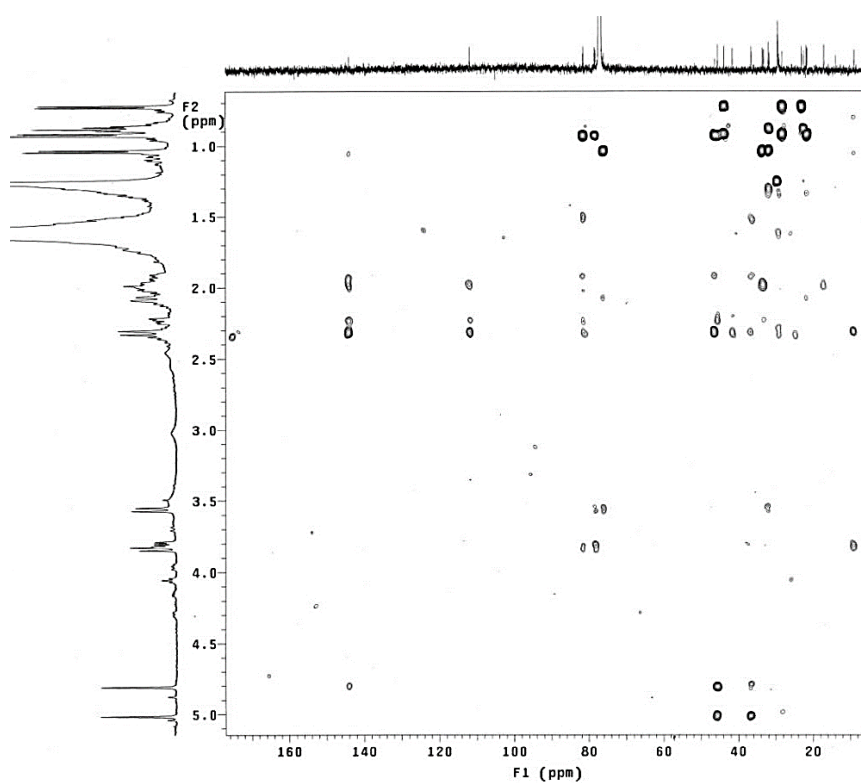

Figure S25. HMBC spectrum of **2** in CDCl<sub>3</sub>.

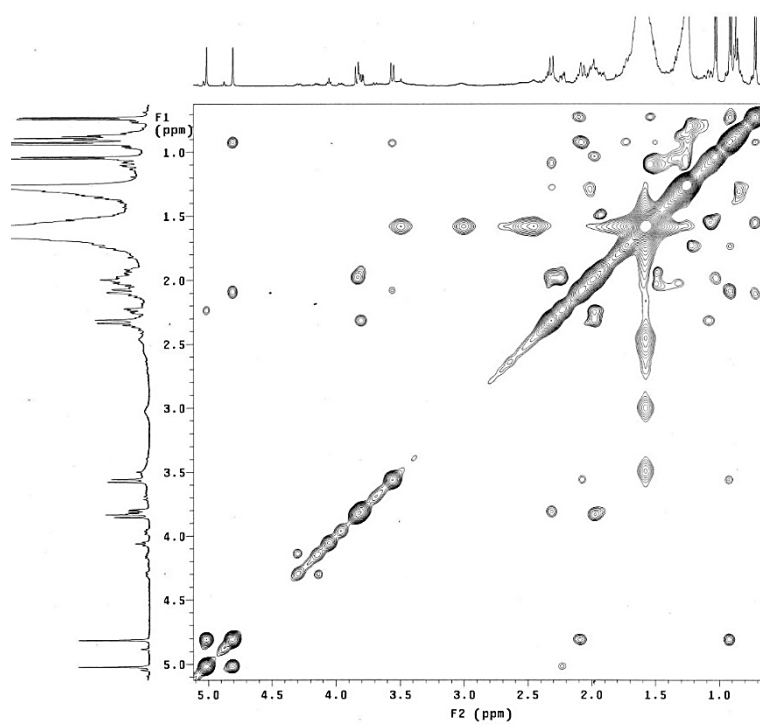

Figure S26. NOESY spectrum of **2** in CDCl<sub>3</sub>.

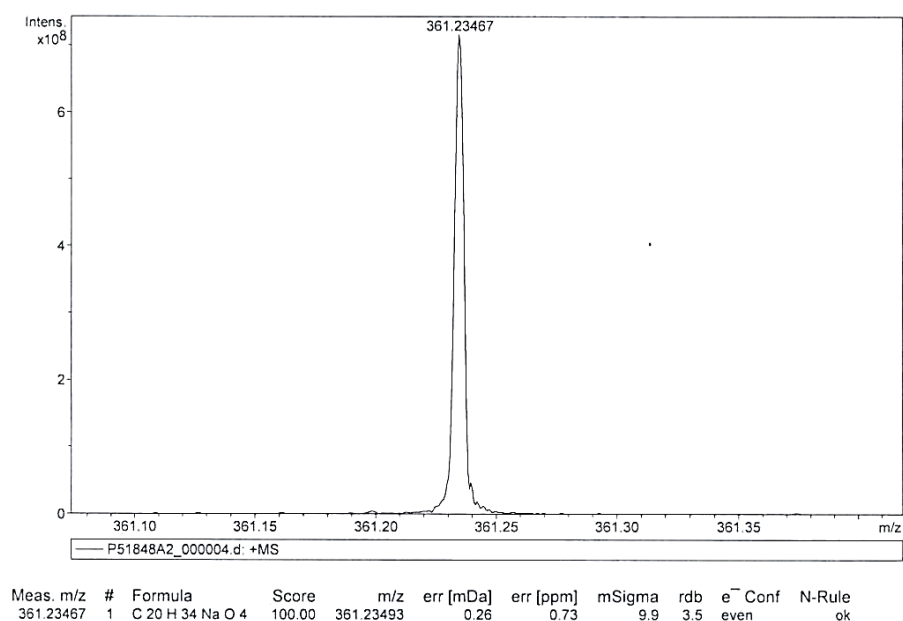

Figure S27. HRESIMS spectrum of 3.

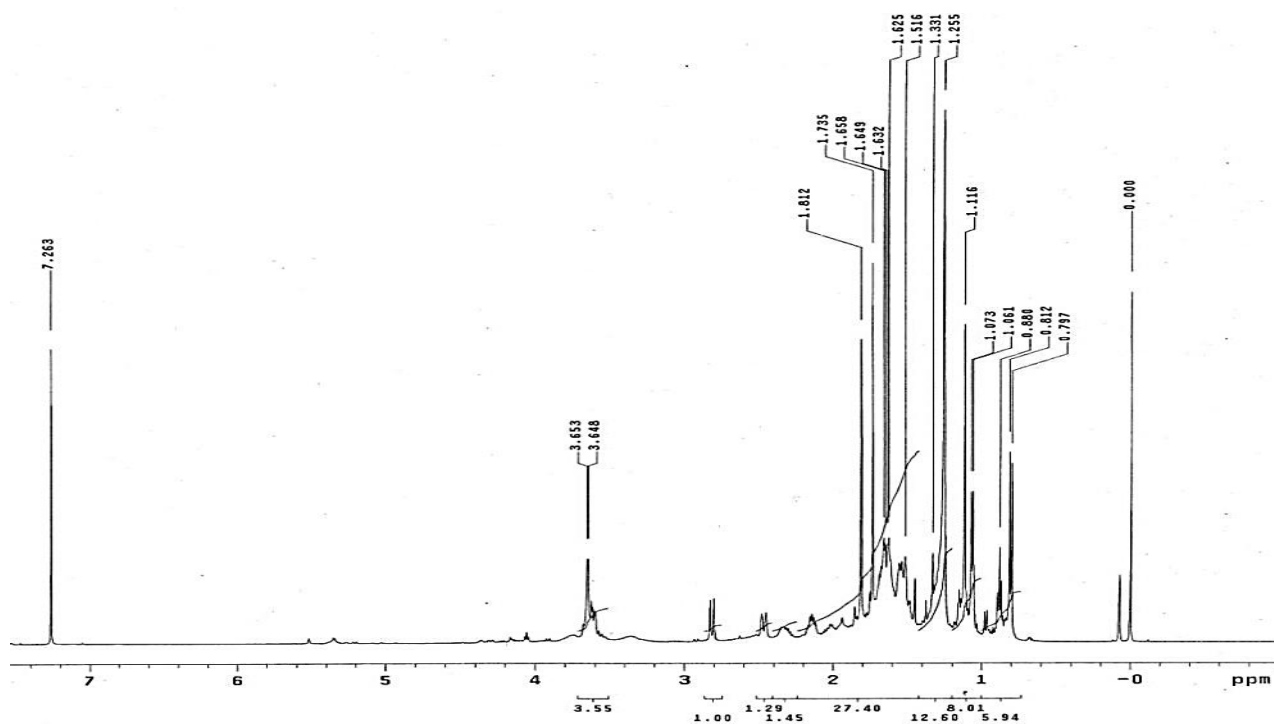Figure S28. <sup>1</sup>H NMR spectrum of 3 in CDCl<sub>3</sub> at 500 MHz.

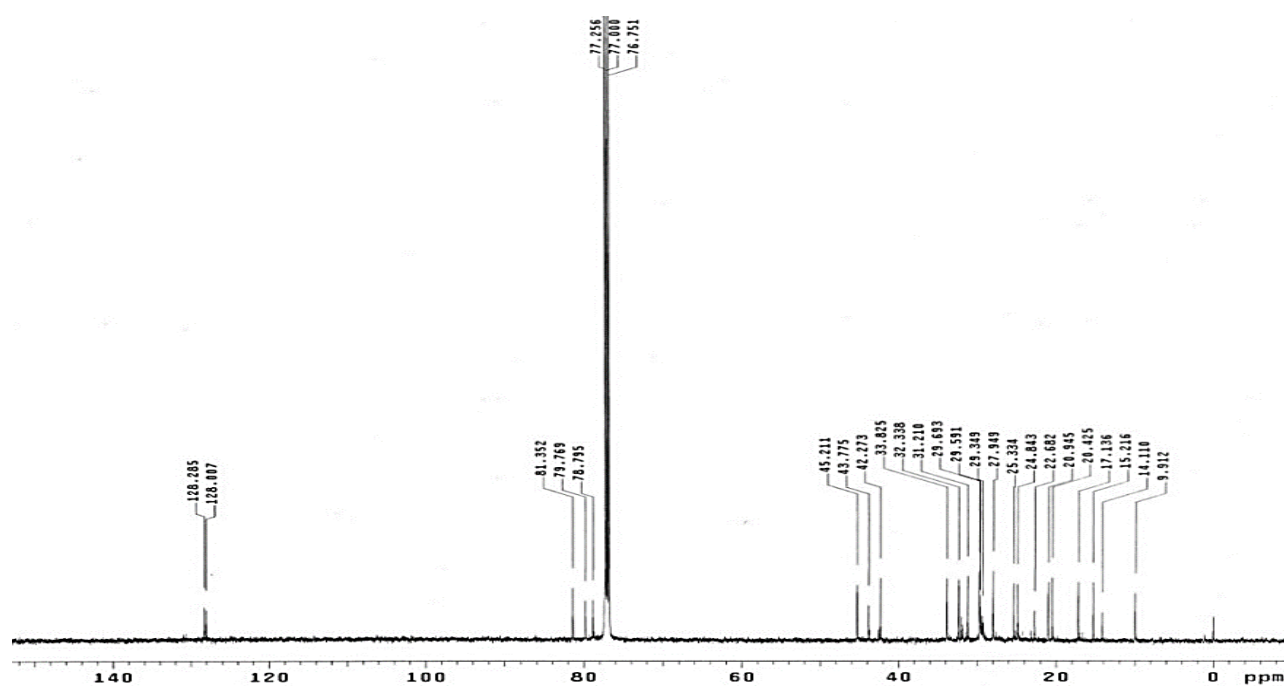

Figure S29. <sup>13</sup>C NMR spectrum of 3 in CDCl<sub>3</sub> at 125 MHz.

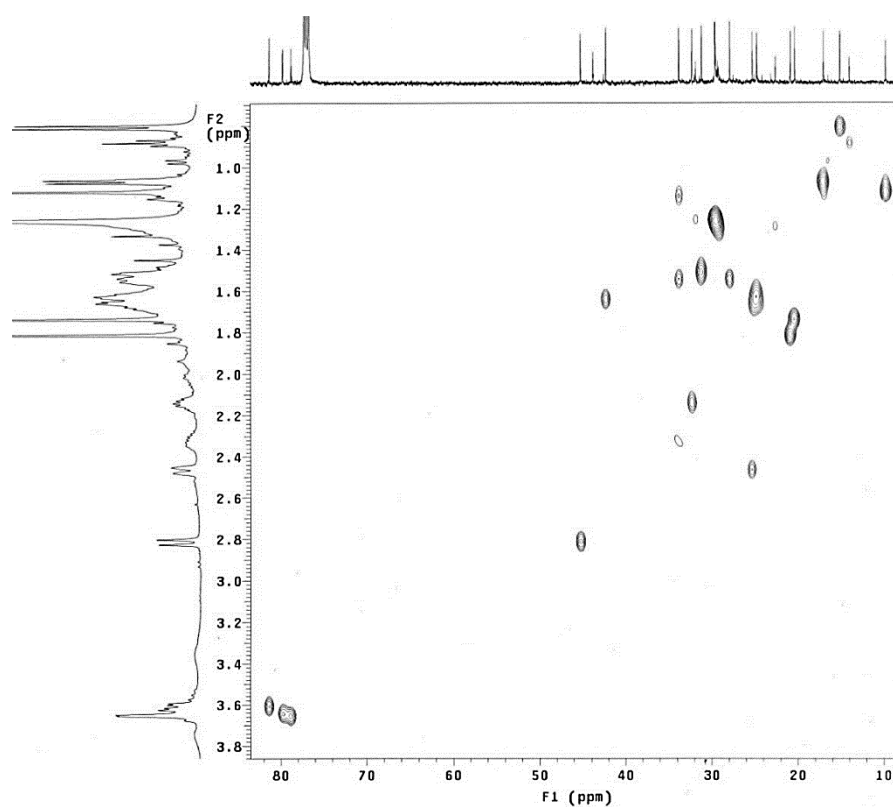

Figure S30. HSQC spectrum of 3 in CDCl<sub>3</sub>.

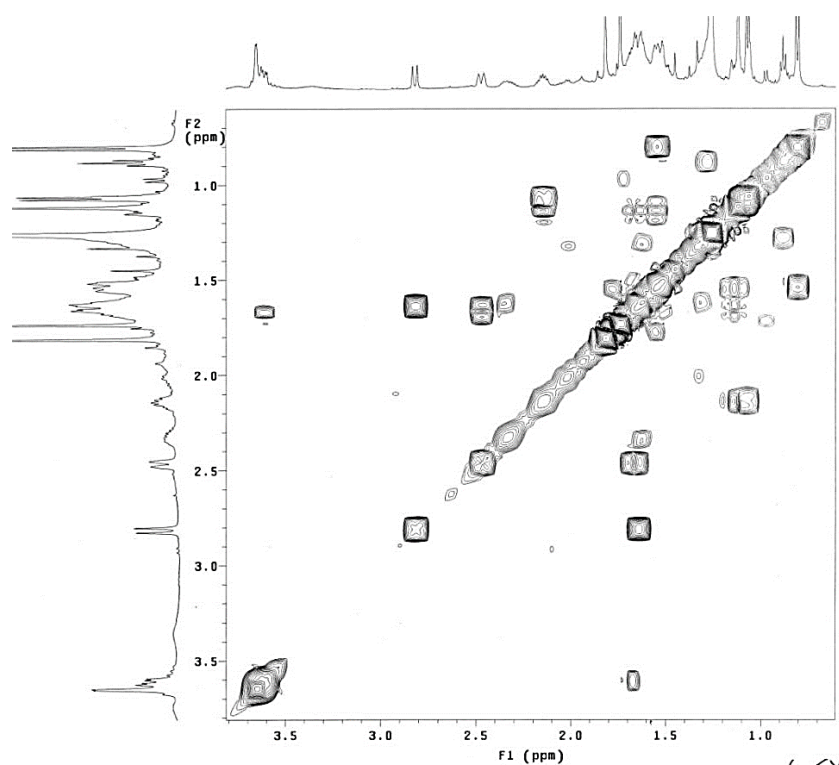

Figure S31. COSY spectrum of 3 in CDCl<sub>3</sub>.

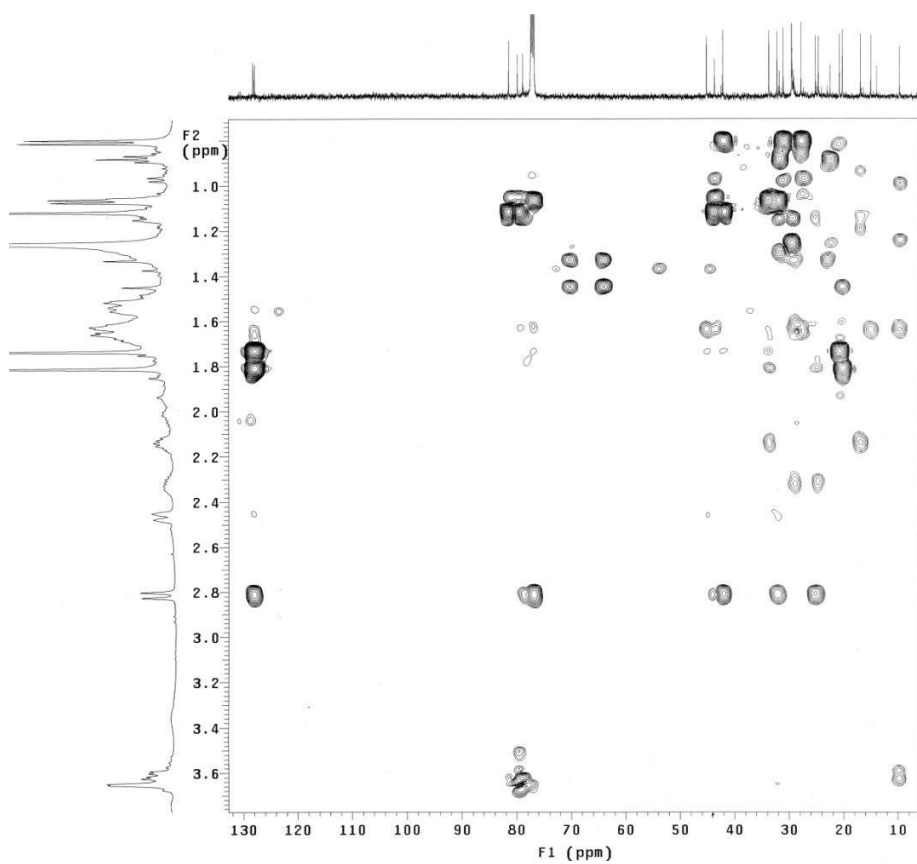

Figure S32. HMBC spectrum of 3 in CDCl<sub>3</sub>.

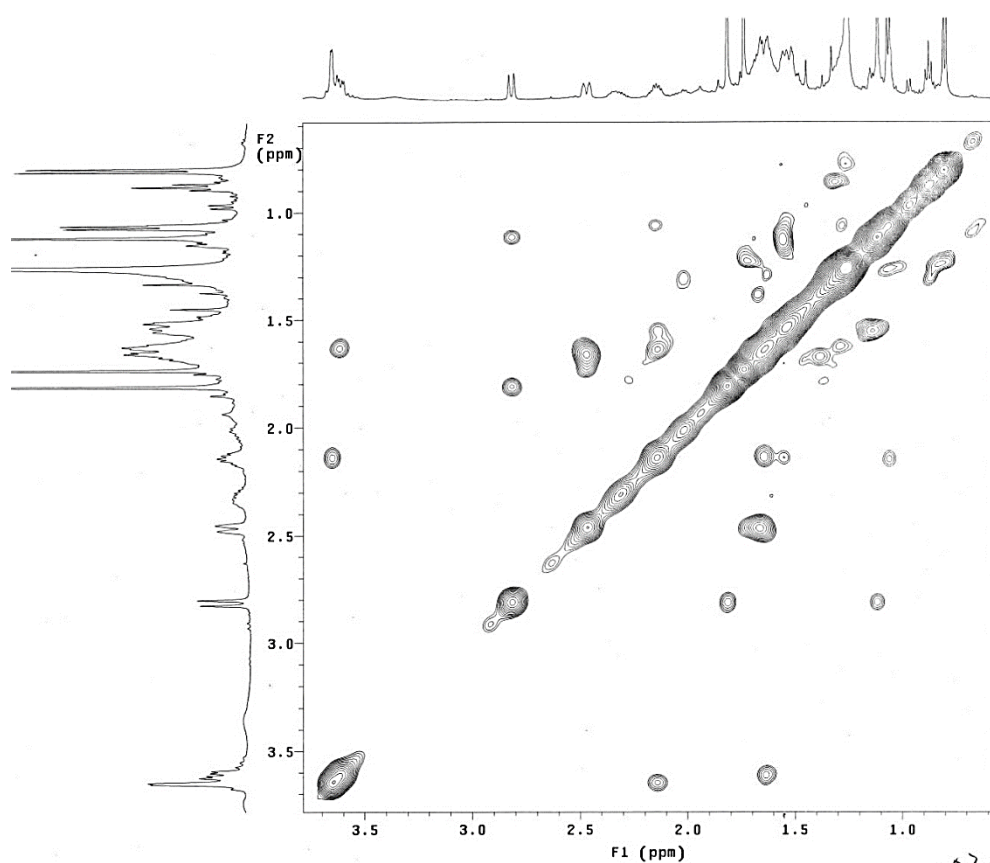Figure S33. NOESY spectrum of **3** in  $\text{CDCl}_3$ .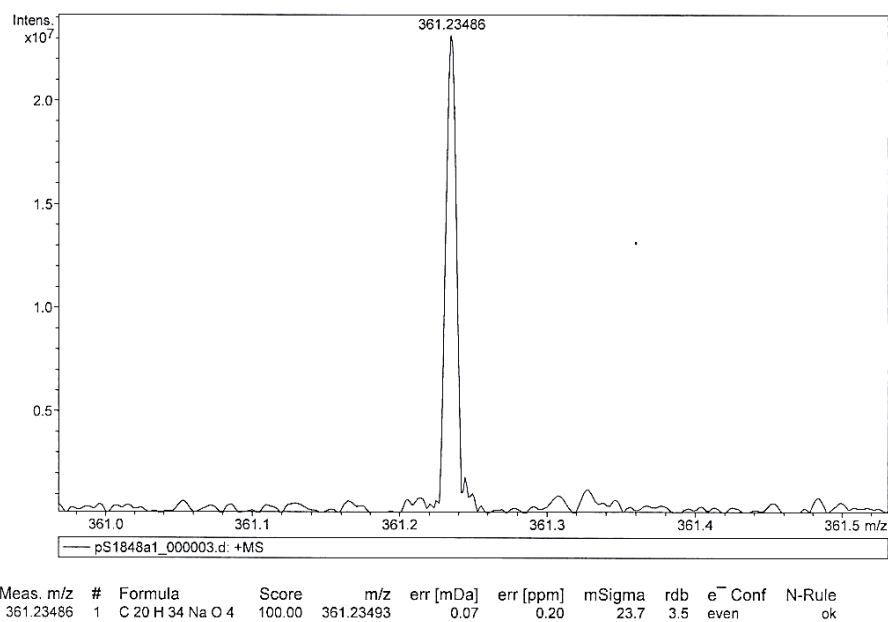Figure S34. HRESIMS spectrum of **4**.

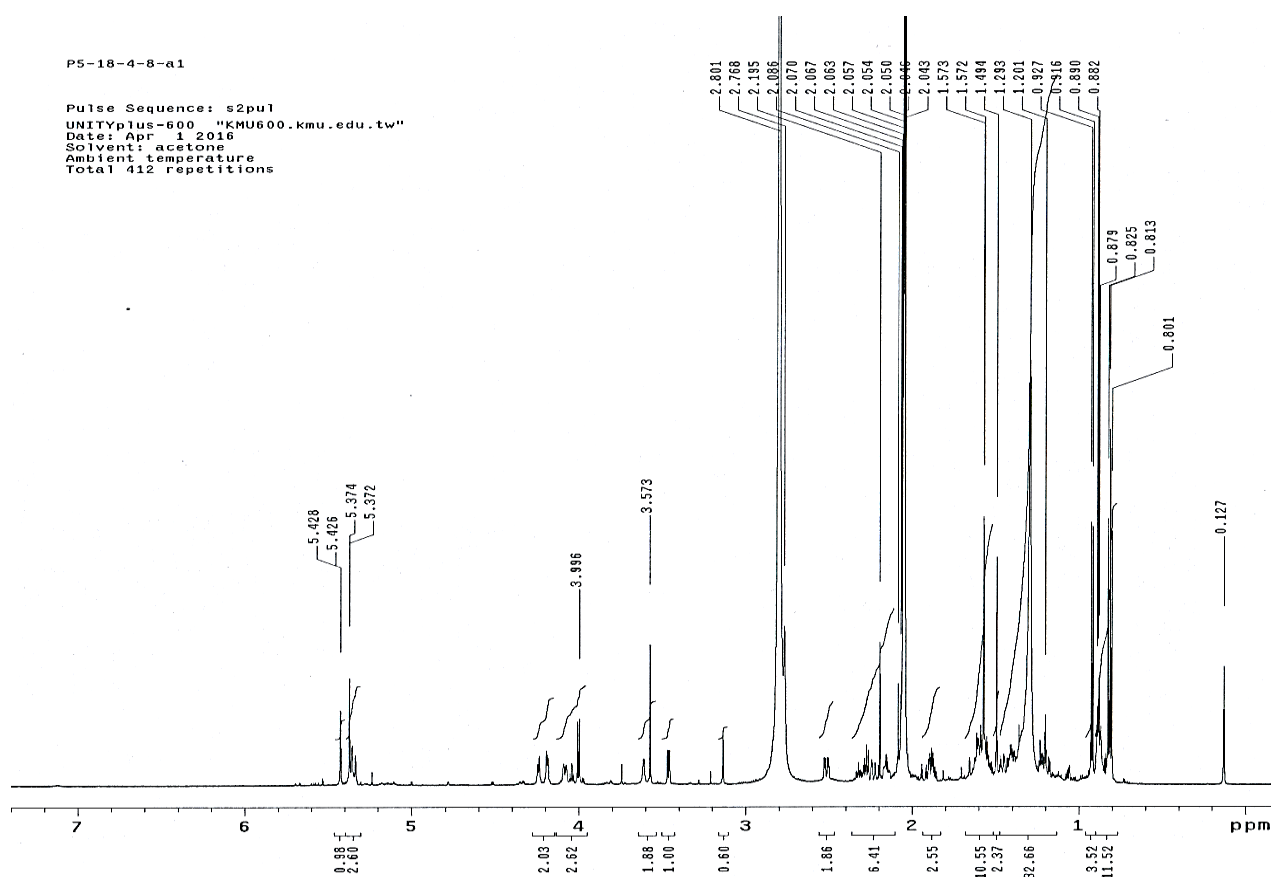

Figure S35.  $^1\text{H}$  NMR spectrum of **4** in acetone- $d_6$  at 600 MHz.

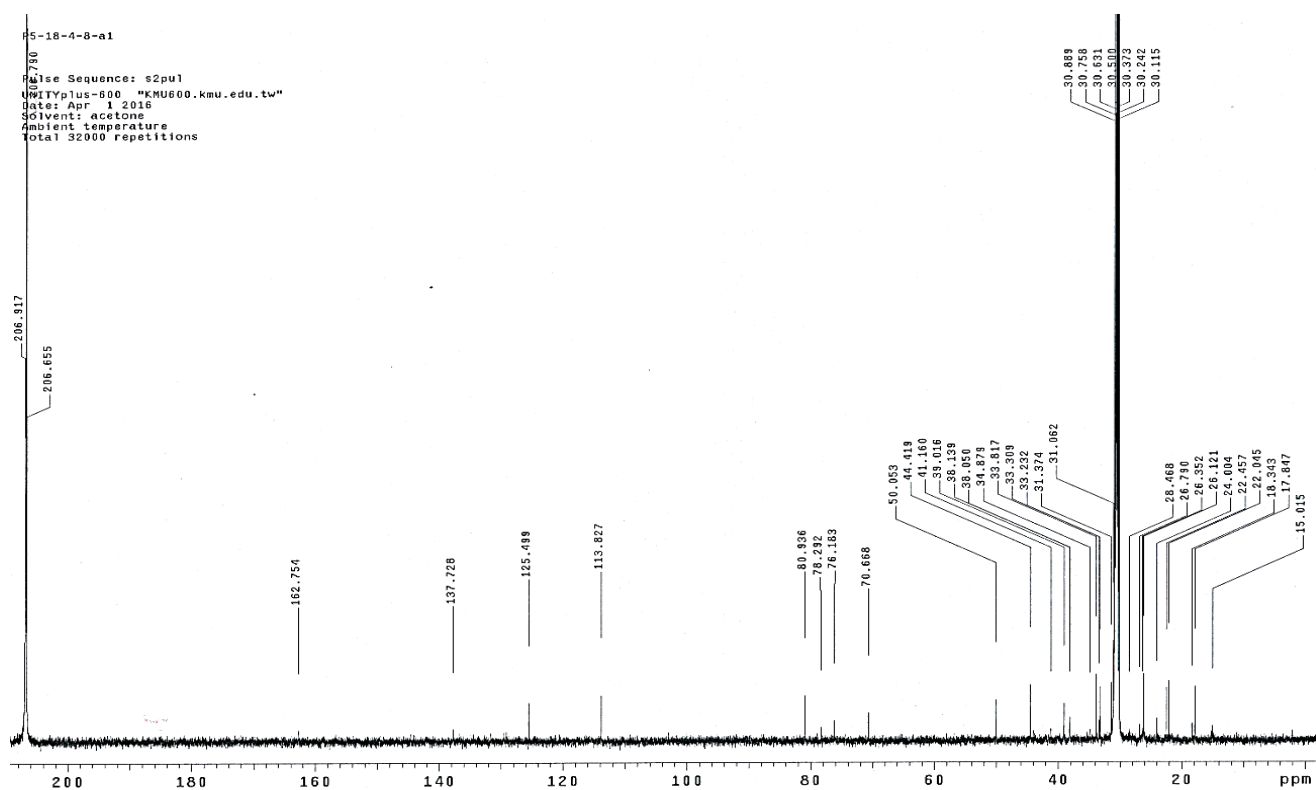

Figure S36.  $^{13}\text{C}$  NMR spectrum of **4** in acetone- $d_6$  at 150 MHz.

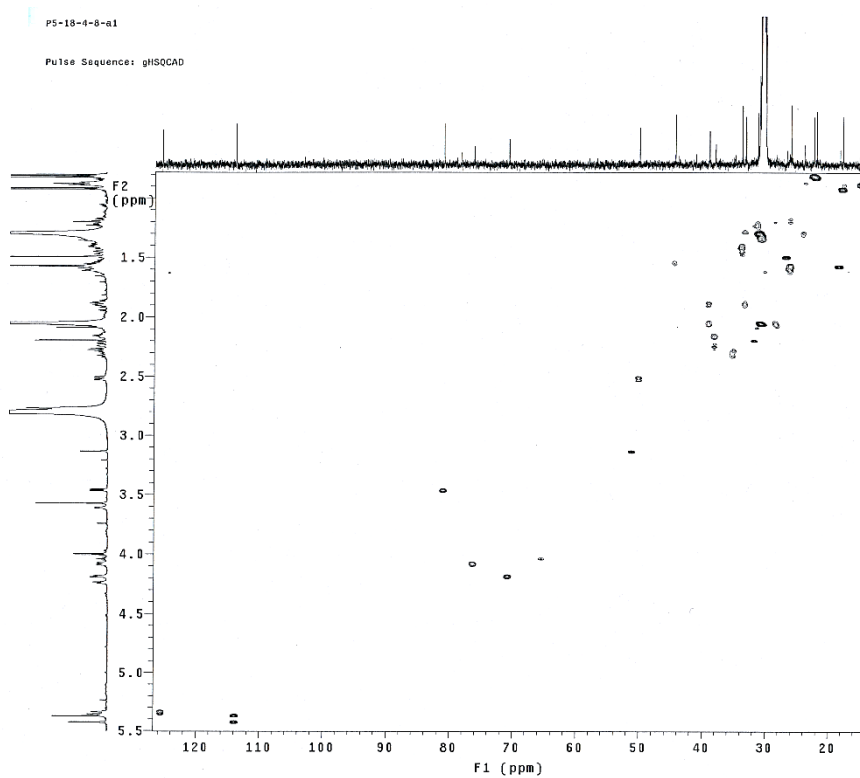

Figure S37. HSQC spectrum of **4** in acetone- $d_6$ .

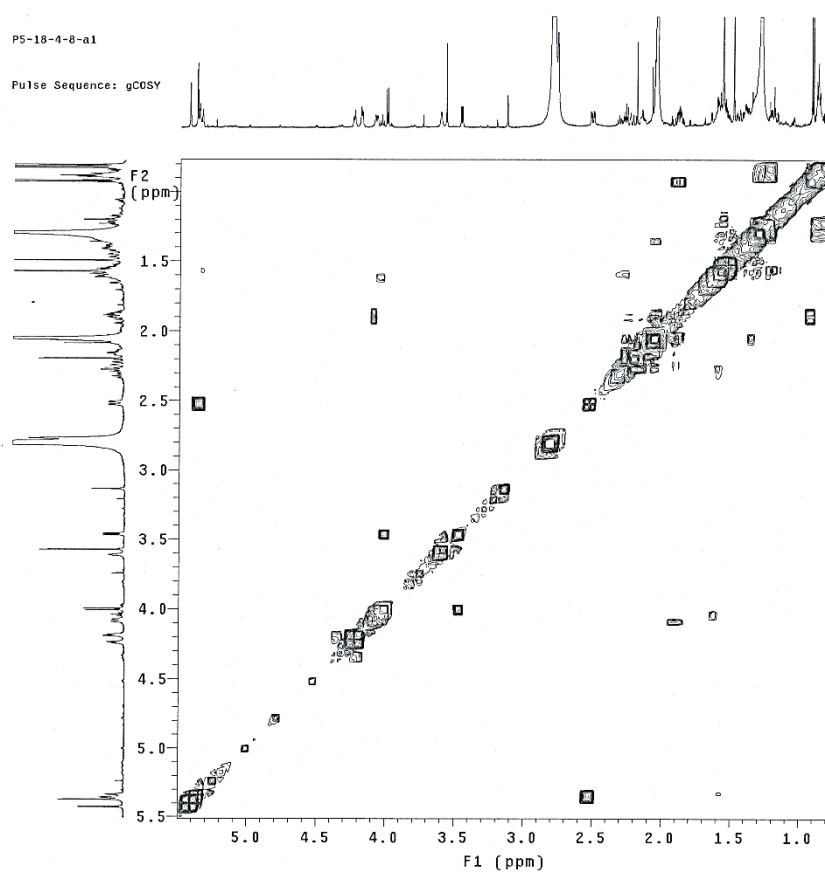Figure S38. COSY spectrum of **4** in acetone- $d_6$ .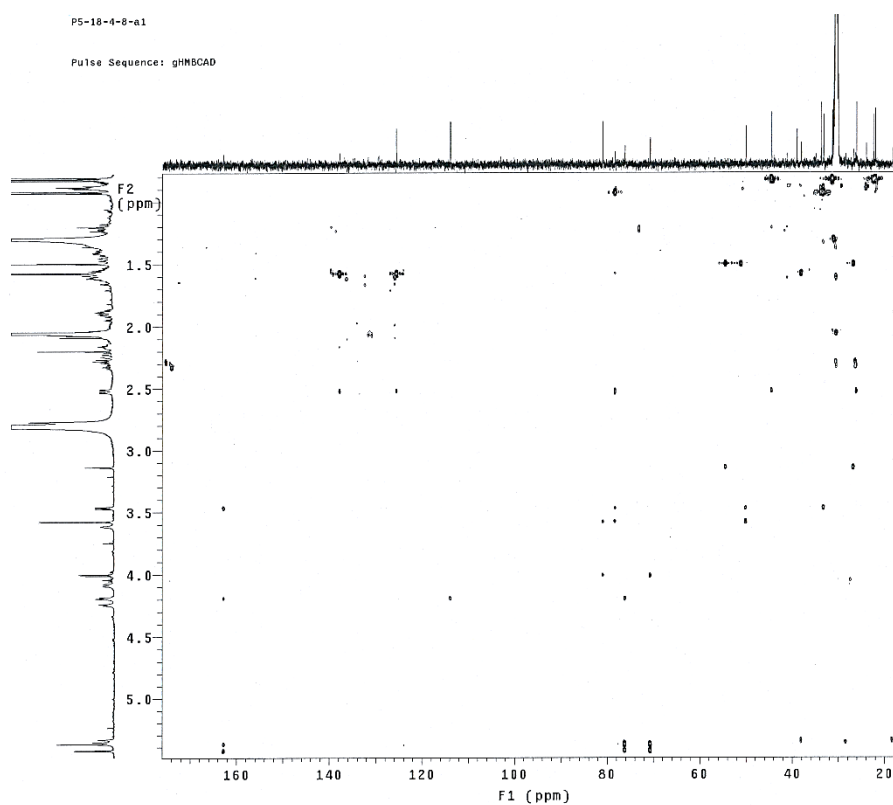Figure S39. HMBC spectrum of **4** in acetone- $d_6$ .

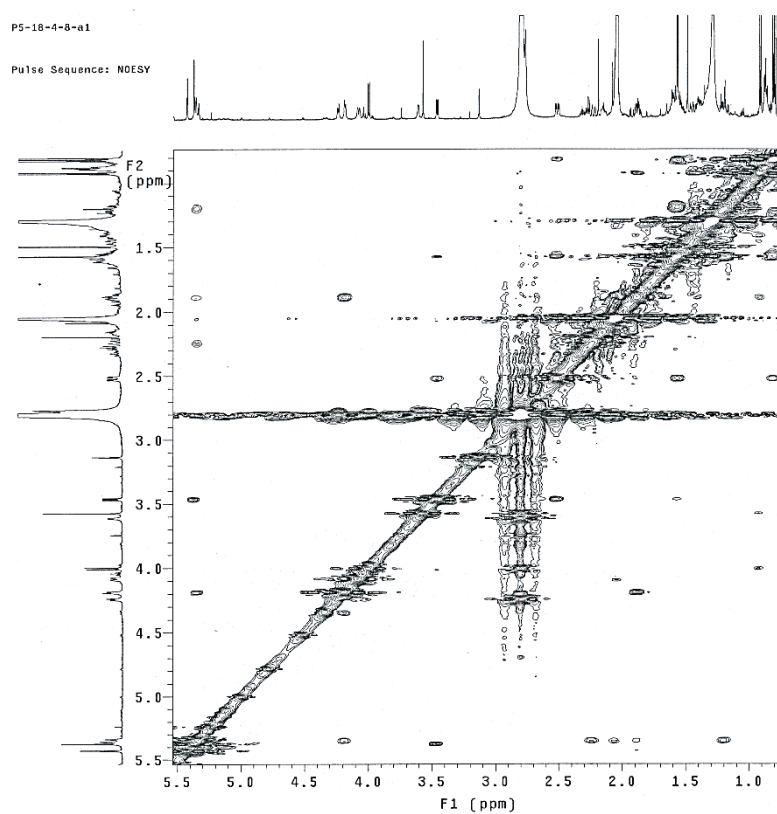

Figure S40. NOESY spectrum of **4** in acetone- $d_6$ .
